1  
2  
3  
4 **Intratumoral MAPK and PI3K signaling pathway heterogeneity in glioblastoma tissue**  
5 **correlates with selective CREB signaling and specific functional gene signatures**  
6  
7  
8  
9

10  
11 Paul M. Daniel, PhD,<sup>1</sup>, Gulay Filiz, BSc,<sup>1</sup>, Martin J. Tymms, PhD,<sup>1</sup>, Robert G. Ramsay, PhD,<sup>1,2</sup>,  
12 Andrew H. Kaye, MD,<sup>3,4</sup>, Stanley S. Stylli, PhD,<sup>3,4</sup>, Theo Mantamadiotis, PhD<sup>1,3,5</sup>  
13  
14

15 <sup>1</sup> Department of Pathology, School of Biomedical Sciences, The University of Melbourne,  
16 Parkville VIC 3010, Victoria, Australia  
17

18 <sup>2</sup> Peter MacCallum Cancer Centre and The Sir Peter MacCallum Department of Oncology,  
19 University of Melbourne, Melbourne, Melbourne 3000, Victoria, Australia.  
20

21 <sup>3</sup> Department of Surgery (RMH), The University of Melbourne, Parkville VIC 3010, Victoria,  
22 Australia  
23  
24

25 <sup>4</sup> Department of Neurosurgery, The Royal Melbourne Hospital, Parkville, Victoria 3050,  
26 Australia  
27  
28

29 <sup>5</sup> Department of Microbiology & Immunology, School of Biomedical Sciences, The University  
30 of Melbourne, Parkville VIC 3010, Victoria, Australia  
31  
32  
33

34  
35 Corresponding author: Theo Mantamadiotis, The University of Melbourne  
36

37 Corresponding author email: [theom@unimelb.edu.au](mailto:theom@unimelb.edu.au)  
38  
39  
40  
41  
42  
43  
44

45  
46 **Keywords: Glioblastoma, cell signaling, heterogeneity, MAPK, PI3K, CREB**  
47

48 **Running Title: Intratumoral signaling heterogeneity in GBM**  
49  
50  
51  
52  
53  
54  
55  
56  
57  
58  
59  
60  
61  
62  
63  
64  
65

## Abstract

Limitations in discovering useful tumor biomarkers and drug targets is not only due to patient-to-patient differences but also due to intratumoral heterogeneity. Heterogeneity arises due to the genetic and epigenetic variation of tumor cells in response to microenvironmental interactions and cytotoxic therapy. We explored specific signaling pathway activation in glioblastoma (GBM) by investigating the intratumoral activation of the MAPK and PI3K pathways. We present data demonstrating a striking preponderance for mutual exclusivity of MAPK and PI3K activation in GBM tissue, where MAPK activation correlates with proliferation and transcription factor CREB activation and PI3K activation correlates with CD44 expression. Bioinformatic analysis of signaling and CREB-regulated target genes supports the immunohistochemical data, showing that the MAPK-CREB activation correlates with proliferative regions. In-silico analysis suggests that MAPK-CREB signaling activates a pro-inflammatory molecular signature and correlates with a mesenchymal GBM subtype profile, while PI3K-CREB activation correlates with the proneural GBM subtype and a tumor cell invasive gene signature. Overall, the data suggests the existence of intratumoral subtype heterogeneity in GBM and that using combinations of both MAPK and PI3K drug inhibitors is necessary for effective targeted therapy.

## Introduction

Problems associated with the treatment of recurrent glioblastoma (GBM) are thought to be due to variations in tumor cell drug sensitivity, as well as the development of tumor cell drug resistance, underpinned by the heterogeneous molecular and genetic nature of GBM. Unravelling the molecular mechanisms underlying the development of the most common and deadly malignant brain cancer, GBM, is necessary to define novel biomarkers and specific druggable targets. The biological and clinical differences of GBM are underpinned by the diverse underlying genetic and molecular landscape. The molecular heterogeneity in GBM is reflected by the varied phenotypic and functional features between GBM subtypes [29, 43]. There is significant difference in response to intensive treatment, which includes chemotherapy with temozolomide or concurrent chemotherapy and radiotherapy, among GBM subtypes. Proneural GBM is least responsive to intensive treatment while classical and mesenchymal subtypes respond relatively well [43]. Underlying differences in therapeutic response between each

1  
2  
3  
4 subtype may be due to the distinct regulatory networks driving the pathology, since each subtype  
5 has a unique regulatory network established by epigenomic, genomic and transcriptomic changes  
6 [4, 8]. As such, the divergent biological attributes of GBM subtypes make characterization not  
7 only important for prognosis but also relevant to identification of subtype-specific therapeutic  
8 targets.  
9

10  
11  
12  
13 Genomic analysis of the mutational spectra of GBM shows that mutations often occur in  
14 multiple components of key signaling pathways which lead to deregulation of downstream  
15 kinase cascades and drive tumorigenesis [6]. Hyperactivation of the MAPK pathway is common  
16 to many cancers including GBM and has been implicated in multiple tumorigenic processes such  
17 as proliferation [1], survival [18] and migration [14]. The core role of MAPK in promoting  
18 malignancy is highlighted by the correlation of hyperactivation of this pathway to poor prognosis  
19 in multiple cancer types including breast [27], colon [36], ovarian [32] and GBM [30, 31].  
20 Signaling through this pathway begins at membrane bound growth factor receptors, typically the  
21 epidermal growth factor receptor (EGFR), which is activated by epidermal growth factor (EGF).  
22 Upon ligand binding, the cytoplasmic domain of the receptor becomes phosphorylated and  
23 recruits the downstream MAPK pathway signaling adapter proteins.  
24  
25  
26  
27  
28  
29  
30  
31  
32

33 Clusters of mutations in multiple MAPK pathway components drive aberrant hyperactivation.  
34 In GBM, five of the top twenty-five mutated genes belong to the MAPK pathway and 83% of all  
35 GBM cases possess a mutation in at least one of these factors [13]. Of the mutations in the  
36 MAPK signaling pathway, the *EGFR* is one of the most common (50%) found in GBM. This is  
37 typified by the EGFRvIII activating mutation, a missense mutation which promotes ligand-  
38 independent activation of the receptor [19], resulting in the ligand-independent, constitutive  
39 activation of EGFR leading to hyperactivation of MAPK pathway. MAPK regulates various  
40 cellular processes via the activation of downstream transcription factors, which in turn regulate  
41 the expression of numerous target genes. A key transcription factors which MAPK regulates  
42 includes the cAMP Response Element Binding Protein (CREB) [46]. We previously showed that  
43 in GBM cells, CREB, a key regulator of cyclin-D1 expression cell and cell proliferation, is co-  
44 activated by MAPK and PI3K signaling [16].  
45  
46  
47  
48  
49  
50  
51  
52  
53  
54

55 Like the MAPK pathway, the PI3K pathway is aberrantly hyperactivated in multiple cancers,  
56 with 60-90% of GBM cases exhibiting an activating mutation in at least one of the core PI3K  
57 pathway genes [12, 20]. Activation of the PI3K pathway is associated with reduced survival in  
58  
59  
60  
61

1  
2  
3  
4 GBM patients [31] and regulates several characteristics of tumor cell biology including survival  
5 [11] and invasion [21]. Upon growth factor ligand-receptor interaction, the PI3K catalytic  
6 subunit, p110 $\alpha$ , converts phosphatidylinositol 4,5-bisphosphate (PIP2) to phosphatidylinositol  
7 3,4,5-triphosphate (PIP3), which then activates AKT [15]. AKT is the terminal kinase which has  
8 a host of target genes together with other kinases, including mTOR [23], pro-survival factor  
9 BCL2 [5] and transcription factors such as FOXO3 [38] and CREB [17]. Notably, many of the  
10 targets for the MAPK pathway are shared by the PI3K pathway, indicative of their overlapping  
11 roles in regulating tumor cell functions.  
12

13  
14  
15  
16  
17  
18  
19 Mutations of activator or inhibitor proteins along the PI3K pathway create the net effect of  
20 PI3K pathway hyperactivation. For example, mutation of tumor suppressor and PI3K pathway  
21 negative regulator, phosphatase and tensin homologue (PTEN), is reported in 30-40% of GBM  
22 cases [12, 43]. Compared to the MAPK pathway, PI3K signaling activation correlates more  
23 weakly with prognosis in GBM [28, 31]. However, experimental evidence shows that PI3K  
24 pathway mutations are drivers / initiating events in glioma [41]. Several mouse models have also  
25 demonstrated that PTEN loss is necessary for initiating GBM when combined with other  
26 oncogenic mutations [2, 45].  
27

28  
29  
30  
31  
32  
33 The MAPK and PI3K cell signaling pathways were originally modelled as linear signaling  
34 intracellular conduits activated by distinct stimuli, but studies have since demonstrated that the  
35 pathways converge to regulate each other and co-regulate downstream functions (reviewed in  
36 [26]). However, each pathway also responds to and implements distinct molecular and cellular  
37 functions. With the view that targeting specific factors regulating specific pathways will disrupt  
38 key tumor cell behaviors, including survival and proliferation, we present data showing that in  
39 GBM tissue, there is regional variation with respect to MAPK and PI3K activation and that there  
40 is a striking preponderance for mutual exclusivity in the activation of the pathways. In situ co-  
41 expression analysis and computational analysis suggests that there are specific roles that each  
42 pathway plays in alliance with the CREB transcription factor. The intratumoral signaling  
43 pathway heterogeneity we identify, has implications on tumor cell behavior and likely has  
44 clinical implications on targeted therapy rationale and GBM subtype determination. Importantly,  
45 the data also supports the view that inhibiting both major cell signaling pathways is always  
46 necessary to effect tumor cell inhibition in GBM.  
47  
48  
49  
50  
51  
52  
53  
54  
55  
56  
57  
58  
59  
60  
61  
62  
63  
64  
65

## Methods

### Ethics Statement

Experiments using fixed GBM tissue were carried out with the approval of The University of Melbourne Office for Research Ethics and Integrity, Human Research Ethics Committee, project ID 1339751.

### Immunostaining

Three different patient tissues, diagnosed as WHO Grade IV/GBM by pathologists at the Royal Melbourne Hospital, were used. Paraffin sections were cut at a thickness of 7 $\mu$ m, cleared of paraffin and rehydrated through an ethanol to water series. All staining and immunohistochemical analysis for each specimen was performed on consecutive serial sections. Hematoxylin and eosin staining was performed. Primary antibodies were incubated overnight at 4°C, washed in PBS and incubated with secondary antibody for 1h at ambient temperature, washed in PBS then developed for chromogenic or fluorescence visualization, as described in the following text. Immunohistochemical detection was performed using a Vectastain ABC kit (Vector Laboratories, Burlingame, CA) and diaminobenzidine (DAB; Merck, Darmstadt, Germany). Immunofluorescence staining was performed using secondary antibodies, Alexa-fluor 488 (green) or 594 (red), at 1:10000 dilution. Primary antibodies were: pAKT(S473) (#9271, Cell Signaling Technology, Danvers, MA), pMAPK pMAPK (#4370, Cell Signaling Technology, Danvers, MA), pCREB (#9198, Cell Signaling Technology, Danvers, MA), PCNA (#2686, Cell Signaling Technology, Danvers, MA), CD44 (#04-1123, Abcam, Australia), MMP-9 (#29579, Anaspec, Fremont, CA). Primary antibody dilutions were at 1:1000 for immunohistochemistry and 1:200 for immunofluorescence. For immunofluorescence staining, coverslips were mounted using Fluoroshield Mounting Medium with DAPI (Abcam, Australia).

### Pathway-specific CREB target gene analysis

The level 3 TCGA Agilent GBM dataset was utilized for the analysis (<https://portal.gdc.cancer.gov/projects/TCGA-GBM>). Gene sets (MSigDB) containing KEGG annotations for the MAPK and the PI3K pathways were used to perform single sample Gene Set Enrichment Analysis (ssGSEA) to define the level of pathway enrichment within individual patients in the GBM dataset. DEseq was used to test for differentially expressed genes between samples with high ( $z > 1$ ) and low ( $z < -1$ ) enrichment of each KEGG pathway [3]. A false discovery rate corrected p-value of  $< 0.1$  was used as a cut-off for differentially expressed genes.

1  
2  
3  
4 Pathway specific differentially expressed genes were then compared to each other to identify  
5 uniquely expressed genes specific to each pathway. To define CREB target genes, pathway  
6 specific genes were interrogated for the presence of a full CRE (cAMP response element) site in  
7 the promoter region, -1000bp to +100bp from the transcription start site (TSS), regions  
8 representing high confidence CREB target gene promoters [47]. The resulting genes were  
9 grouped as PI3K-CREB and MAPK-CREB gene modules for downstream analysis.  
10  
11  
12  
13  
14  
15

## 16 **Results**

### 17 **Preponderance for intratumoral mutual exclusivity of MAPK and PI3K activation in GBM**

18  
19 Immunohistochemical analysis of consecutive formalin-fixed paraffin-embedded (FFPE)  
20 tissue sections from three independent GBM (WHO Grade IV) patient tissues showed that in  
21 regions enriched in pMAPK expression, pAKT expression was low/undetectable and vice versa  
22 (Fig 1A, B). pMAPK positive regions exhibited overlapping expression with proliferating cell  
23 nuclear antigen (PCNA), matrix metalloproteinase-9 (MMP-9) and pCREB, while regions high in  
24 pAKT expression overlapped with CD44 expression but not the other biomarkers. Olig-2  
25 expression also closely correlated with pMAPK expression (not shown). Tissue  
26 immunofluorescence staining showed that the same cells expressing pMAPK also expressed  
27 pCREB (Fig 2A), confirming the immunohistochemical data, while pAKT positive cells were  
28 mostly pCREB negative (Fig 2B), although there was co-expression of pAKT and pCREB in the  
29 same cells in the bordering regions.  
30  
31  
32  
33  
34  
35  
36  
37  
38  
39  
40

### 41 **Distinct pathway-specific activation of CREB target gene expression in GBM**

42  
43 To investigate specific cell-associated functions of the MAPK and PI3K pathways in GBM  
44 and how these pathways differentially regulate common transcriptional targets, we used the  
45 TCGA GBM Agilent microarray RNA expression datasets and developed an in-silico analysis  
46 pipeline (Fig 3A), to identify CREB target genes expressed under the control of the PI3K  
47 pathway or MAPK pathway. The expression of 132 CREB target genes were specifically  
48 expressed when the MAPK pathway was activated (MAPK-CREB gene module) while 114  
49 CREB target genes were expressed, only when the PI3K pathway was activated (PI3K-CREB  
50 gene module) (Table 1).  
51  
52  
53  
54  
55  
56

57 Gene clustering analysis showed that PI3K-CREB signaling regulates target genes identified  
58 by the GO (Gene Ontology) term ‘metastasis’, suggesting that these genes are involved in  
59  
60  
61  
62  
63  
64  
65

1  
2  
3  
4 regulating tumor cell migration / invasion, while MAPK-CREB regulated genes are categorized  
5 as genes regulating ‘proliferation’ and ‘inflammation’ (Fig 3B). Further interrogation of genes  
6 showed that MAPK-CREB genes were enriched for GO terms, ‘Positive Regulation of  
7 Biological Process’, ‘Signal Transduction’ and ‘Positive Regulation of Cellular Process’,  
8 whereas PI3K-CREB genes were enriched for GO terms ‘Cellular Macromolecule Metabolic  
9 Process’, ‘Biopolymer Metabolic Process’ and ‘Cellular Protein Metabolic Process’. Further  
10 curation of gene function using Genecards (<http://www.genecards.org/>) [34], identified specific  
11 cellular and molecular functions of the target genes and identified genes which may be involved  
12 in cross-pathway regulation (Table 3). PI3K-CREB regulated, DUSP8, negatively regulates  
13 MAPKs, while the MAPK-CREB regulated protein PML inhibits AKT1, a key kinase of the  
14 PI3K pathway[34]. Overall, PI3K-CREB regulated genes were themselves regulators of multiple  
15 signal transduction pathways, including the PI3K, WNT, JNK, PKC and MAPK pathways and  
16 regulators of transcription, illustrating the broad involvement of the PI3K-CREB in regulating  
17 complex molecular and cellular functions. The MAPK-CREB target genes identified also fell  
18 into broad categories but also identified inflammation and angiogenesis as key, more specific  
19 functions (Table 3).  
20  
21  
22  
23  
24  
25  
26  
27  
28  
29  
30  
31  
32

### 33 **MAPK-CREB signaling correlates with proliferation and inflammation**

34  
35 For patient tumors highly enriched for MAPK-CREB gene expression, there was a strong  
36 correlation with proliferation and pro-inflammatory functions (Fig 3). The 115 gene PI3K-CREB  
37 module, showed an enrichment of genes involved in metastasis but no association with  
38 proliferation or pro-inflammation genes. VEGFA, FLT1 and FGD5 were amongst the genes  
39 identified which regulate proliferation and angiogenesis, while three genes involved in the NFκB  
40 pro-inflammatory pathway, TNFS14, TNFAIP3 and TICAM1, were also identified as MAPK-  
41 CREB regulated genes (Table 3).  
42  
43  
44  
45  
46  
47

### 48 **MAPK-CREB target genes but not PI3K-CREB target genes are associated with poorer 49 survival in GBM**

50  
51 To determine whether the difference in gene targets regulated by the MAPK-CREB and  
52 PI3K-CREB modules was reflected in patient prognosis, clinical parameters from the TCGA  
53 GBM dataset were analyzed (Fig 3-5A, B). Patient tumors which were enriched for MAPK-  
54 CREB target genes had a poorer prognosis than those which were not enriched for this gene  
55 module (372 days vs 502 days,  $p=6.21 \times 10^{-4}$ ; Fig 4A). By contrast, PI3K-CREB target gene  
56  
57  
58  
59  
60  
61  
62  
63  
64  
65

1  
2  
3  
4 expression did not correlate with a difference in survival between patients which had high or low  
5 gene enrichment scores. Notably, PI3K or MAPK gene expression modules, independent of the  
6 CREB-regulated target genes with high-confidence CRE promoter sequences, did not identify  
7  
8 populations with significantly different survival (not shown).  
9  
10

### 11 **Pathway-specific CREB transcriptomes correlates with GBM subtype**

12  
13 Previous data, from deep genomic and proteomic analysis of 543 GBMs, has implicated  
14 distinct signaling pathways to be represented in each GBM subtype; with MEK/MAPK highly  
15 activated the mesenchymal subtype and PI3K highly activated in the proneural subtype [7]. To  
16 investigate whether the respective PI3K-CREB and MAPK-CREB gene expression modules  
17 represented distinct GBM subtypes, computational analysis was undertaken using the TCGA  
18 GBM dataset which includes information on the GBM subtype per patient specimen. The  
19 mesenchymal subtype expression profile was significantly over-represented ( $p=6.7 \times 10^{-8}$ ) in  
20 GBM enriched for the MAPK-CREB module, while the PI3K-CREB module was enriched in the  
21 proneural subtype (Fig 4B), consistent with earlier work [7].  
22  
23  
24  
25  
26  
27  
28  
29  
30

### 31 **Discussion**

32  
33 The MAPK and PI3K signal transduction pathways are aberrantly activated in cancer cells and  
34 this aberration drives GBM drives key tumor cell behaviors advantageous to these cells,  
35 including proliferation, survival and migration/invasion. The mutual exclusivity between the  
36 PI3K and MAPK pathways identified in our study is poorly described in the literature. In vitro  
37 investigation of signal transduction often reports that the MAPK and PI3K pathways are co-  
38 activated and are somewhat redundant and are also able to compensate for each other [44]. One  
39 contributing factor to this discrepancy between in vitro and in vivo results we present, is the  
40 intrinsic bias which culture conditions have on signaling. Cell lines are usually grown as a  
41 monolayer and maintained in medium containing serum which ensures every cell is exposed to  
42 the same growth factors which simultaneously hyperactivate multiple pathways to maximize cell  
43 proliferation and survival. This does not replicate the diverse and dynamic conditions of the  
44 tumor microenvironment, with heterogeneous tumor cell activation, which over time, regulates  
45 distinct tumor phenotypes.  
46  
47  
48  
49  
50  
51  
52  
53  
54  
55  
56

57 Tumor heterogeneity is largely attributed to genomic events including mutations and  
58 epigenetic changes within tumor cells. Moreover, many targeted therapies attempt to inhibit one  
59  
60  
61



1  
2  
3  
4 of these two key pathways using drugs targeting one of more pivotal molecules within the  
5  
6 pathway. One of the difficulties in the analysis of tumor biology is a whole-tumor molecular  
7  
8 view of intracellular events. Various experimental techniques can determine tumor gene  
9  
10 sequence, mRNA and/or protein expression levels [12, 25, 43]. Examination of large numbers of  
11  
12 patient GBM tissue biopsies using tissue microarrays have yielded important data on the  
13  
14 expression of hundreds of proteins [42]. Despite the importance of these large-scale “omic”  
15  
16 studies, the samples are lysates from a mixed cell population, devoid of the regional  
17  
18 heterogeneity in tumors, in situ. High-throughput single cell analysis techniques can bypass some  
19  
20 of the issues, but it remains to be seen how representative individual isolated cell experiments  
21  
22 are, compared to in situ cell behaviors. One approach to interrogate the molecular events in  
23  
24 GBM is to examine large tissue sections and multiple biomarkers which represent specific  
25  
26 biological functions and/or therapeutic targets. A recent study demonstrates the value of this  
27  
28 approach and analyzed tumor biomarkers using an integrated multiplexed tissue imaging  
29  
30 platform on FFPE breast tumor tissue and correlated biomarker expression and MAPK and PI3K  
31  
32 pathway activation with specific oncogenic mutations and histopathological diagnosis and  
33  
34 demonstrated regional intra-tumoral pathway and biomarker expression heterogeneity [35]. We  
35  
36 previously showed that proliferative and invasive GBM tumor regions, characterized by high  
37  
38 olig-2 and CD44 expression, respectively, are regionally separated [9, 10] and that this  
39  
40 expression is also associated with distinct GBM subtypes and that GBM heterogeneity can at  
41  
42 least, in part, be attributed to intrinsic properties of the tumor cells. However, the status of the  
43  
44 MAPK and PI3K pathways was not investigated.

45  
46 In the present study, we showed that in GBM there was a mutual exclusivity of MAPK active  
47  
48 tissue regions and PI3K active regions, in the same tissue biopsy. The activation status of MAPK  
49  
50 active regions correlated with expression of the proliferation biomarker, PCNA [39], tumor cell  
51  
52 invasion biomarker MMP-9 [22], pCREB expression, a pro-oncogenic transcription factor  
53  
54 regulating genes involved in proliferation and survival [16, 24, 37] but little or no expression of  
55  
56 CD44, a biomarker of tumor stem cells and cell invasion [33]. PI3K pathway active regions  
57  
58 exhibited high levels of CD44 expression but little or no expression of PCNA, pCREB or MMP-  
59  
60 9. The regionally distinct expression of MMP-9 and CD44 is interesting, since both genes are  
61  
62 associated with tumor cell invasion/migration but in this case, it appears that these proteins may  
63  
64 have distinct tumor promoting functions.  
65

1  
2  
3  
4 In-silico analysis showed that CREB sits at signaling convergence point downstream of both  
5 the MAPK and PI3K pathways with target genes activated common to both pathways but also  
6 distinct target genes, specific for each of the upstream pathways. Highly expressed PI3K-CREB  
7 target genes are prominent in ‘metastasis’ functions, suggesting that PI3K-CREB signals may be  
8 important for regulating the invasive behaviors of GBM cells. MAPK-CREB target genes are  
9 clearly associated with proliferation and inflammation. The clinical relevance of the analysis was  
10 highlighted by the finding that MAPK-CREB target genes but not PI3K-CREB target genes are  
11 associated with poorer survival in GBM and that the mesenchymal GBM subtype was over-  
12 represented in patient tissue showing high MAPK-CREB target genes expression, whereas PI3K-  
13 CREB target gene expression correlated with the proneural GBM subtype. It is important to note  
14 that the distinct mesenchymal and proneural subtypes discussed in our study coexist in the same  
15 tumor tissue, while the literature has generally inferred that GBM subtypes are patient-specific.  
16 Our findings support a less prevalent view that single GBM tumors harbor more than one  
17 subtype signature, as proposed by Sotoriva and colleagues [40]. This also raises the question of,  
18 why the distinct signaling-CREB gene modules show differences in patient survival? We  
19 propose that when MAPK-CREB target gene expression across the whole GBM tumor is high,  
20 this drives a more malignant phenotype and shorter survival, compared with tumors with higher  
21 PI3K-CREB regulated gene expression.  
22  
23  
24  
25  
26  
27  
28  
29  
30  
31  
32  
33  
34  
35  
36

37 Overall, the data presented here suggests that distinct MAPK and PI3K pathway activation  
38 and the downstream consequences lead to specific tumor cell responses. These regional  
39 variations may be caused by transient or long-term microenvironmental differences across the  
40 tissue. Regional signaling responses in the tumor tissue may also account for setting up  
41 topographically defined tumor tissue domains, similar to morphogenetic field responses in  
42 embryonic tissue. It is possible that neighboring cells within GBM tissue exhibit transient  
43 dynamic signaling events but how dynamic these regional differences are, remains to be  
44 determined and would require a means to monitor pathway activity, in situ. Another important  
45 issue raised by the data, is that GBM tumor cells do not require the simultaneous activation of  
46 both the MAPK and PI3K pathways. The clinical significance of the study is that it supports the  
47 view that for effective targeted GBM therapy, inhibiting both pathways, in combination with  
48 standard therapy, is necessary. If combined targeting proves to be too toxic, an alternative  
49 strategy may be that pharmacologically manipulating tumor cell signaling and dependence, from  
50  
51  
52  
53  
54  
55  
56  
57  
58  
59  
60  
61  
62  
63  
64  
65

1  
2  
3  
4 MAPK to PI3K, may shift GBM cells to a less malignant state, extending the therapeutic window  
5  
6 and overall survival.  
7  
8

## 9 **Acknowledgments**

10 Parts of this work were funded by a CASS Foundation Grant (7941) and Brain Foundation  
11  
12 Award.  
13  
14

## 15 **References**

- 16 1 Albeck JG, Mills GB, Brugge JS (2013) Frequency-modulated pulses of ERK activity transmit  
17 quantitative proliferation signals. *Molecular cell* 49: 249-261 Doi 10.1016/j.molcel.2012.11.002
- 18 2 Alcantara Llaguno S, Chen J, Kwon CH, Jackson EL, Li Y, Burns DK, Alvarez-Buylla A, Parada  
19 LF (2009) Malignant astrocytomas originate from neural stem/progenitor cells in a somatic tumor  
20 suppressor mouse model. *Cancer Cell* 15: 45-56 Doi 10.1016/j.ccr.2008.12.006
- 21 3 Anders S, Huber W (2010) Differential expression analysis for sequence count data. *Genome*  
22 *biology* 11: R106 Doi 10.1186/gb-2010-11-10-r106
- 23 4 Bozdag S, Li A, Baysan M, Fine HA (2014) Master regulators, regulatory networks, and  
24 pathways of glioblastoma subtypes. *Cancer informatics* 13: 33-44 Doi 10.4137/CIN.S14027
- 25 5 Bratton MR, Duong BN, Elliott S, Weldon CB, Beckman BS, McLachlan JA, Burow ME (2010)  
26 Regulation of ERalpha-mediated transcription of Bcl-2 by PI3K-AKT crosstalk: implications for  
27 breast cancer cell survival. *International journal of oncology* 37: 541-550
- 28 6 Brennan C, Momota H, Hambardzumyan D, Ozawa T, Tandon A, Pedraza A, Holland E (2009)  
29 Glioblastoma subclasses can be defined by activity among signal transduction pathways and  
30 associated genomic alterations. *PLoS One* 4: e7752 Doi 10.1371/journal.pone.0007752
- 31 7 Brennan CW, Verhaak RG, McKenna A, Campos B, Nounshmehr H, Salama SR, Zheng S,  
32 Chakravarty D, Sanborn JZ, Berman SH et al (2013) The somatic genomic landscape of  
33 glioblastoma. *Cell* 155: 462-477 Doi 10.1016/j.cell.2013.09.034
- 34 8 Brown DV, Daniel PM, D'Abaco GM, Gogos A, Ng W, Morokoff AP, Mantamadiotis T (2015)  
35 Coexpression analysis of CD133 and CD44 identifies Proneural and Mesenchymal subtypes of  
36 glioblastoma multiforme. *Oncotarget* 6: 6267-6280
- 37 9 Brown DV, Daniel PM, D'Abaco GM, Gogos A, Ng W, Morokoff AP, Mantamadiotis T (2015)  
38 Coexpression analysis of CD133 and CD44 identifies Proneural and Mesenchymal subtypes of  
39 glioblastoma multiforme. *Oncotarget*:  
40  
41
- 42 10 Brown DV, Filiz G, Daniel PM, Hollande F, Dworkin S, Amiridis S, Kountouri N, Ng W,  
43 Morokoff AP, Mantamadiotis T (2017) Expression of CD133 and CD44 in glioblastoma stem  
44 cells correlates with cell proliferation, phenotype stability and intra-tumor heterogeneity. *PLoS*  
45 *One* 12: e0172791 Doi 10.1371/journal.pone.0172791
- 46 11 Brunet A, Bonni A, Zigmond MJ, Lin MZ, Juo P, Hu LS, Anderson MJ, Arden KC, Blenis J,  
47 Greenberg ME (1999) Akt promotes cell survival by phosphorylating and inhibiting a Forkhead  
48 transcription factor. *Cell* 96: 857-868
- 49 12 Cancer Genome Atlas Research N (2008) Comprehensive genomic characterization defines  
50 human glioblastoma genes and core pathways. *Nature* 455: 1061-1068 Doi 10.1038/nature07385
- 51 13 Cerami E, Gao J, Dogrusoz U, Gross BE, Sumer SO, Aksoy BA, Jacobsen A, Byrne CJ, Heuer  
52 ML, Larsson E et al (2012) The cBio cancer genomics portal: an open platform for exploring  
53 multidimensional cancer genomics data. *Cancer discovery* 2: 401-404 Doi 10.1158/2159-  
54 8290.CD-12-0095  
55  
56  
57  
58  
59  
60  
61  
62  
63  
64  
65

- 1  
2  
3  
4 14 Chen H, Zhu G, Li Y, Padia RN, Dong Z, Pan ZK, Liu K, Huang S (2009) Extracellular signal-  
5 regulated kinase signaling pathway regulates breast cancer cell migration by maintaining slug  
6 expression. *Cancer research* 69: 9228-9235 Doi 10.1158/0008-5472.CAN-09-1950  
7  
8 15 Czech MP (2000) PIP2 and PIP3: complex roles at the cell surface. *Cell* 100: 603-606  
9  
10 16 Daniel P, Filiz G, Brown DV, Hollande F, Gonzales M, D'Abaco G, Papalexis N, Phillips WA,  
11 Malaterre J, Ramsay R et al (2014) Selective CREB-dependent cyclin expression mediated by  
12 the PI3K and MAPK pathways supports glioma cell proliferation. *Oncogenesis* 3: e108 Doi  
13 10.1038/oncsis.2014.21  
14  
15 17 Du K, Montminy M (1998) CREB is a regulatory target for the protein kinase Akt/PKB. *J Biol*  
16 *Chem* 273: 32377-32379  
17  
18 18 Failly M, Korur S, Egler V, Boulay JL, Lino MM, Imber R, Merlo A (2007) Combination of  
19 sublethal concentrations of epidermal growth factor receptor inhibitor and microtubule stabilizer  
20 induces apoptosis of glioblastoma cells. *Molecular cancer therapeutics* 6: 773-781 Doi  
21 10.1158/1535-7163.MCT-06-0566  
22  
23 19 Guo G, Gong K, Wohlfeld B, Hatanpaa KJ, Zhao D, Habib AA (2015) Ligand-Independent  
24 EGFR Signaling. *Cancer research*: Doi 10.1158/0008-5472.CAN-15-0989  
25  
26 20 Kita D, Yonekawa Y, Weller M, Ohgaki H (2007) PIK3CA alterations in primary (de novo) and  
27 secondary glioblastomas. *Acta Neuropathol* 113: 295-302 Doi 10.1007/s00401-006-0186-1  
28  
29 21 Kleber S, Sancho-Martinez I, Wiestler B, Beisel A, Gieffers C, Hill O, Thiemann M, Mueller W,  
30 Sykora J, Kuhn A et al (2008) Yes and PI3K bind CD95 to signal invasion of glioblastoma.  
31 *Cancer cell* 13: 235-248 Doi 10.1016/j.ccr.2008.02.003  
32  
33 22 Kondraganti S, Mohanam S, Chintala SK, Kin Y, Jasti SL, Nirmala C, Lakka SS, Adachi Y,  
34 Kyritsis AP, Ali-Osman F et al (2000) Selective suppression of matrix metalloproteinase-9 in  
35 human glioblastoma cells by antisense gene transfer impairs glioblastoma cell invasion. *Cancer*  
36 *Res* 60: 6851-6855  
37  
38 23 Laplante M, Sabatini DM (2012) mTOR signaling in growth control and disease. *Cell* 149: 274-  
39 293 Doi 10.1016/j.cell.2012.03.017  
40  
41 24 Mantamadiotis T, Papalexis N, Dworkin S (2012) CREB signalling in neural stem/progenitor  
42 cells: recent developments and the implications for brain tumour biology. *Bioessays* 34: 293-300  
43 Doi 10.1002/bies.201100133  
44  
45 25 Marziali G, Signore M, Buccarelli M, Grande S, Palma A, Biffoni M, Rosi A, D'Alessandris QG,  
46 Martini M, Larocca LM et al (2016) Metabolic/Proteomic Signature Defines Two Glioblastoma  
47 Subtypes With Different Clinical Outcome. *Sci Rep* 6: 21557 Doi 10.1038/srep21557  
48  
49 26 Mendoza MC, Er EE, Blenis J (2011) The Ras-ERK and PI3K-mTOR pathways: cross-talk and  
50 compensation. *Trends Biochem Sci* 36: 320-328 Doi 10.1016/j.tibs.2011.03.006  
51  
52 27 Mittal S, Sharma A, Balaji SA, Gowda MC, Dighe RR, Kumar RV, Rangarajan A (2014)  
53 Coordinate hyperactivation of Notch1 and Ras/MAPK pathways correlates with poor patient  
54 survival: novel therapeutic strategy for aggressive breast cancers. *Molecular cancer therapeutics*  
55 13: 3198-3209 Doi 10.1158/1535-7163.MCT-14-0280  
56  
57 28 Mizoguchi M, Betensky RA, Batchelor TT, Bernay DC, Louis DN, Nutt CL (2006) Activation of  
58 STAT3, MAPK, and AKT in malignant astrocytic gliomas: correlation with EGFR status, tumor  
59 grade, and survival. *J Neuropathol Exp Neurol* 65: 1181-1188 Doi  
60 10.1097/01.jnen.0000248549.14962.b2  
61  
62 29 Patel AP, Tirosch I, Trombetta JJ, Shalek AK, Gillespie SM, Wakimoto H, Cahill DP, Nahed BV,  
63 Curry WT, Martuza R et al (2014) Single-cell RNA-seq highlights intratumoral heterogeneity in  
64 primary glioblastoma. *Science* 344: 1396-1401 Doi 10.1126/science.1254257  
65  
66 30 Patil CG, Nuno M, Elramsisy A, Mukherjee D, Carico C, Dantis J, Hu J, Yu JS, Fan X, Black  
67 K et al (2013) High levels of phosphorylated MAP kinase are associated with poor survival  
68 among patients with glioblastoma during the temozolomide era. *Neuro-oncology* 15: 104-111 Doi  
69 10.1093/neuonc/nos272

- 1  
2  
3  
4 31 Pelloski CE, Lin E, Zhang L, Yung WK, Colman H, Liu JL, Woo SY, Heimberger AB, Suki D,  
5 Prados Met al (2006) Prognostic associations of activated mitogen-activated protein kinase and  
6 Akt pathways in glioblastoma. *Clin Cancer Res* 12: 3935-3941 Doi 12/13/3935 [pii]  
7  
8 10.1158/1078-0432.CCR-05-2202  
9  
10 32 Penzvalto Z, Lanczky A, Lenart J, Meggyeshazi N, Krenacs T, Szoboszlai N, Denkert C, Pete I,  
11 Gyorffy B (2014) MEK1 is associated with carboplatin resistance and is a prognostic biomarker  
12 in epithelial ovarian cancer. *BMC cancer* 14: 837 Doi 10.1186/1471-2407-14-837  
13  
14 33 Radotra B, McCormick D (1997) Glioma invasion in vitro is mediated by CD44-hyaluronan  
15 interactions. *J Pathol* 181: 434-438 Doi 10.1002/(SICI)1096-9896(199704)181:4<434::AID-  
16 PATH797>3.0.CO;2-S  
17  
18 34 Rebhan M, Chalifa-Caspi V, Prilusky J, Lancet D (1997) GeneCards: integrating information  
19 about genes, proteins and diseases. *Trends Genet* 13: 163  
20  
21 35 Roberts E, Jacob T, Garsha K, Ramunno-Johnson D, Ventura F, Korkola J, Ashworth-Sharpe J,  
22 Johnson D, Corless C, Troxell Met al (2016) Mapping cancer signaling networks by an integrated  
23 multiplexed tissue imaging platform. *Technology* 4: Doi  
24 <https://doi.org/10.1142/S2339547816500060>  
25  
26 36 Samowitz WS, Sweeney C, Herrick J, Albertsen H, Levin TR, Murtaugh MA, Wolff RK, Slattery  
27 ML (2005) Poor survival associated with the BRAF V600E mutation in microsatellite-stable  
28 colon cancers. *Cancer research* 65: 6063-6069 Doi 10.1158/0008-5472.CAN-05-0404  
29  
30 37 Sampurno S, Bijenhof A, Cheasley D, Xu H, Robine S, Hilton D, Alexander WS, Pereira L,  
31 Mantamadiotis T, Malaterre Jet al (2013) The Myb-p300-CREB axis modulates intestine  
32 homeostasis, radiosensitivity and tumorigenesis. *Cell Death Dis* 4: e605 Doi  
33 10.1038/cddis.2013.119  
34  
35 38 Santo EE, Stroeken P, Sluis PV, Koster J, Versteeg R, Westerhout EM (2013) FOXO3a is a  
36 major target of inactivation by PI3K/AKT signaling in aggressive neuroblastoma. *Cancer*  
37 *research* 73: 2189-2198 Doi 10.1158/0008-5472.CAN-12-3767  
38  
39 39 Sasaki A, Naganuma H, Kimura R, Isoe S, Nakano S, Nukui H, Suzuki K, Kawaoi A (1992)  
40 Proliferating cell nuclear antigen (PCNA) immunostaining as an alternative to  
41 bromodeoxyuridine (BrdU) immunostaining for brain tumours in paraffin embedded sections.  
42 *Acta Neurochir (Wien)* 117: 178-181  
43  
44 40 Sottoriva A, Spiteri I, Piccirillo SG, Touloumis A, Collins VP, Marioni JC, Curtis C, Watts C,  
45 Tavaré S (2013) Intratumor heterogeneity in human glioblastoma reflects cancer evolutionary  
46 dynamics. *Proc Natl Acad Sci U S A* 110: 4009-4014 Doi 10.1073/pnas.1219747110  
47  
48 41 Tamborero D, Gonzalez-Perez A, Perez-Llamas C, Deu-Pons J, Kandath C, Reimand J, Lawrence  
49 MS, Getz G, Bader GD, Ding L et al (2013) Comprehensive identification of mutational cancer  
50 driver genes across 12 tumor types. *Sci Rep* 3: 2650 Doi 10.1038/srep02650  
51  
52 42 Uhlen M, Fagerberg L, Hallstrom BM, Lindskog C, Oksvold P, Mardinoglu A, Sivertsson A,  
53 Kampf C, Sjostedt E, Asplund A et al (2015) Proteomics. Tissue-based map of the human  
54 proteome. *Science* 347: 1260419 Doi 10.1126/science.1260419  
55  
56 43 Verhaak RG, Hoadley KA, Purdom E, Wang V, Qi Y, Wilkerson MD, Miller CR, Ding L, Golub  
57 T, Mesirov JP et al (2010) Integrated genomic analysis identifies clinically relevant subtypes of  
58 glioblastoma characterized by abnormalities in PDGFRA, IDH1, EGFR, and NF1. *Cancer Cell*  
59 17: 98-110 Doi 10.1016/j.ccr.2009.12.020  
60  
61 44 Vitucci M, Karpinich NO, Bash RE, Werneke AM, Schmid RS, White KK, McNeill RS, Huff B,  
62 Wang S, Van Dyke T et al (2013) Cooperativity between MAPK and PI3K signaling activation is  
63 required for glioblastoma pathogenesis. *Neuro Oncol* 15: 1317-1329 Doi 10.1093/neuonc/not084  
64  
65 45 Xiao A, Wu H, Pandolfi PP, Louis DN, Van Dyke T (2002) Astrocyte inactivation of the pRb  
66 pathway predisposes mice to malignant astrocytoma development that is accelerated by PTEN  
67 mutation. *Cancer cell* 1: 157-168

1  
2  
3  
4  
5  
6  
7  
8  
9  
10  
11  
12  
13  
14  
15  
16  
17  
18  
19  
20  
21  
22  
23  
24  
25  
26  
27  
28  
29  
30  
31  
32  
33  
34  
35  
36  
37  
38  
39  
40  
41  
42  
43  
44  
45  
46  
47  
48  
49  
50  
51  
52  
53  
54  
55  
56  
57  
58  
59  
60  
61  
62  
63  
64  
65

46 Xing J, Ginty DD, Greenberg ME (1996) Coupling of the RAS-MAPK pathway to gene  
activation by RSK2, a growth factor-regulated CREB kinase. *Science* 273: 959-963  
47 Zhang X, Odom DT, Koo SH, Conkright MD, Canettieri G, Best J, Chen H, Jenner R,  
Herbolsheimer E, Jacobsen E et al (2005) Genome-wide analysis of cAMP-response element  
binding protein occupancy, phosphorylation, and target gene activation in human tissues.  
*Proceedings of the National Academy of Sciences of the United States of America* 102: 4459-  
4464 Doi 0501076102 [pii] 10.1073/pnas.0501076102

## Figure Legends

**Fig. 1. Distinct expression of activated MAPK and PI3K pathways and GBM tumor biomarkers in GBM tissue.** (A) IHC analysis of groups of consecutive slides from three GBM patient specimens, showing distinct patterns of co-localization of pCREB with pERK1/2, pAKT(S473), PCNA and CD44. Scale bar = 5mm. (B) Biomarker expression in different regions of the same tumor (tumor 2). Scale bar = 200 $\mu$ m.

**Fig. 2. Co-expression of the MAPK and PI3K pathways with activated CREB in GBM tissue.** Immunofluorescence of GBM patient specimens were co-stained with pAKT(S473) and pCREB antibodies or pMAPK and pCREB antibodies to investigate co-localization in GBM cells, showing the co-expression of these proteins in GBM tissue. Sections were also stained with DAPI to highlight the cell nuclei. Scale bar = 100 $\mu$ m.

**Fig.3. Pathway-specific CREB target genes are functionally distinct in GBM.** A) Schematic showing the flow of single-sample Gene Set Enrichment Analysis (ssGSEA) used to analyze the TCGA GBM gene expression data set to enrich for MAPK and PI3K signature genes which are putative CREB target genes. See Methods for details. (B) GSEA analysis of 543 GBM patient expression and clinical data for signal pathway and CREB target gene enrichment demonstrating enrichment of MAPK-CREB genes and PI3K-CREB genes and associated tumor functions; colored bars represent individual patients from the TCGA cohort.

**Fig. 4. Pathway-specific CREB target gene expression correlates with survival and GBM subtype.** A) Survival analysis of patients defined by enrichment of MAPK-CREB and PI3K-CREB target genes. B) The MAPK- CREB signaling-transcription module associates with Mesenchymal (MES) subtype GBM and PI3K- CREB module associates with Proneural (PN) GBM. “All samples” refers to the GBM subtype distribution of the 543 patient samples in TCGA. NL – Neural; CL – Classical.

bioRxiv preprint doi: <https://doi.org/10.1101/305052>; this version posted April 20, 2018. The copyright holder for this preprint (which was not certified by peer review) is the author/funder, who has granted bioRxiv a license to display the preprint in perpetuity. It is made available under aCC-BY-NC-ND 4.0 International license.

**Table 1. CREB targets regulated by the MAPK and PI3K pathways.** The number of genes differentially expressed in GBM (TCGA-GBM dataset), compared to normal brain tissue. Genes were divided into those associated with either the MAPK or PI3K pathways, using the Kyoto Encyclopedia of Genes and Genomes (KEGG) gene function annotations. From these genes, overexpressed genes were selected and CREB target genes identified. The last column indicates the number of CREB target genes unique to each pathway.

| Pathway (KEGG) | Differentially Expressed Genes | Overexpressed Genes | Total CREB target genes | CREB Target Genes Unique to Pathway |
|----------------|--------------------------------|---------------------|-------------------------|-------------------------------------|
| MAPK Pathway   | 2846                           | 930                 | 161                     | 132                                 |
| PI3K Pathway   | 2546                           | 1068                | 203                     | 114                                 |



bioRxiv preprint doi: <https://doi.org/10.1101/305052>; this version posted April 20, 2018. The copyright holder for this preprint (which was not certified by peer review) is the author/funder, who has granted bioRxiv a license to display the preprint in perpetuity. It is made available under aCC-BY-NC-ND 4.0 International license.

**Table 2. Gene ontology for PI3K-CREB and MAPK-CREB target gene modules.** Listing of the most significant genes identified using the pipeline analysis described in Material and Methods and Fig 3A. (FDR = False-Discovery Rate).

| Gene module | Gene Ontology Descriptor                  | Gene Symbol                                                                                                                                   | p-value               | FDR                   |
|-------------|-------------------------------------------|-----------------------------------------------------------------------------------------------------------------------------------------------|-----------------------|-----------------------|
| PI3K-CREB   | Cellular Macromolecule Metabolic Process  | PICK1, PDPK1, CDC42BPB, GAL3ST1, DUSP8, CSNK1E, TUFM, B3GALT2, UBE4A2, PYGM, MAPT, EIF4A2, MGEA5                                              | 4.49x10 <sup>-6</sup> | 6.53x10 <sup>-3</sup> |
|             | Biopolymer Metabolic Process              | PICK1, PDPK1, CDC42BPB, GAL3ST1, DUSP8, CSNK1E, TUFM, B3GALT2, UBE4A2, ARID1A, HDAC5, SNR, HTATSF1, KLF13                                     | 1.69x10 <sup>-5</sup> | 6.59x10 <sup>-3</sup> |
|             | Cellular Protein Metabolic Process        | PICK1, PDPK1, CDC42BPB, GAL3ST1, DUSP8, CSNK1E, TUFM, B3GALT2, UBE4A2, MAPT, EIF4A2, MGEA5                                                    | 2.08x10 <sup>-5</sup> | 6.59x10 <sup>-3</sup> |
| MAPK-CREB   | Positive Regulation of Biological Process | SCG2, NLRC4, TNFSF14, PML, ECL1, DAPK3, TICAM1, RHOG, VEGFA, MAP2K3, HSP90AA1, TPP1, FLT1, C2                                                 | 1.98x10 <sup>-8</sup> | 2.85x10 <sup>-5</sup> |
|             | Signal Transduction                       | SCG2, NLRC4, TNFSF14, PML, ECL1, DAPK3, TICAM1, RHOG, VEGFA, MAP2K3, ARHGAP27, GADD45B, TNFAIP3, FGD5, HOMER3, TRH, ZYX, CSNK1G2, IL7R, RCAN1 | 4.86x10 <sup>-8</sup> | 3.54x10 <sup>-5</sup> |
|             | Positive Regulation of Cellular Process   | SCG2, NLRC4, TNFSF14, PML, ECL1, DAPK3, TICAM1, RHOG, VEGFA, MAP2K3, HSP90AA1, TPP1, FLT1,                                                    | 7.64x10 <sup>-8</sup> | 3.7x10 <sup>-5</sup>  |

bioRxiv preprint doi: <https://doi.org/10.1101/305052>; this version posted April 20, 2018. The copyright holder for this preprint (which was not certified by peer review) is the author/funder, who has granted bioRxiv a license to display the preprint in perpetuity. It is made available under aCC-BY-NC-ND 4.0 International license.

**Table 3. Molecular functions for PI3K-CREB and MAPK-CREB target genes.** Functions

were identified by GO in Table 2. Bold gene names indicate factors with cross-pathway regulatory functions.

| Gene module | Gene Symbol                  | Molecular Function                                         | Cell Function       |                                                                           |                |
|-------------|------------------------------|------------------------------------------------------------|---------------------|---------------------------------------------------------------------------|----------------|
| PI3K-CREB   | PDPK1                        | PI3K PATHWAY                                               | Signaling           |                                                                           |                |
|             | CSNK1E                       | WNT PATHWAY                                                |                     |                                                                           |                |
|             | CDC42BPB                     | JNK PATHWAY                                                |                     |                                                                           |                |
|             | PICK1                        | PKC PATHWAY                                                |                     |                                                                           |                |
|             | <b>DUSP8</b>                 | <b>MAPK SIGNALING</b>                                      | Transcription       |                                                                           |                |
|             | ARID1A<br>HDAC5              | CHROMATIN REMODELLING                                      |                     |                                                                           |                |
|             | HTATSF1<br>KLF13             | ELONGATION FACTOR<br>REPRESSOR                             |                     |                                                                           |                |
| MAPK-CREB   | NLRC4                        | INFLAMMASOME                                               | Inflammation        |                                                                           |                |
|             | ECL1                         | CHEMOKINE RECEPTOR                                         |                     |                                                                           |                |
|             | TNFAIP3                      | TNF PATHWAY                                                |                     |                                                                           |                |
|             | TNFSF14<br>TNFAIP3<br>TICAM1 | NFKB PATHWAY                                               | Signaling           |                                                                           |                |
|             | MAP2K3                       | MAPK PATHWAY                                               |                     |                                                                           |                |
|             | <b>PML</b>                   | <b>PI3K INHIBITOR</b>                                      |                     |                                                                           |                |
|             | CSNK1G2                      | WNT PATHWAY                                                |                     |                                                                           |                |
|             | HSP90AA1                     | CHROMATIN MODELLING                                        | Transcription       |                                                                           |                |
|             | VEGFA<br>FLT1<br>FGD5        | GROWTH FACTOR<br>VEGF-A/-B RECEPTOR<br>RAS-RELATED PROTEIN | Angiogenesis        |                                                                           |                |
|             |                              | VEGFA<br>FLT1<br>FGD5<br>RHOG                              |                     | GROWTH FACTOR<br>VEGF-A/-B RECEPTOR<br>RAS-RELATED PROTEIN<br>RAS HOMOLOG | Cell migration |
|             |                              |                                                            |                     | DAPK3                                                                     |                |
|             | TICAM1                       |                                                            | TOLL-LIKE RECEPTOR  |                                                                           |                |
|             | GADD45B                      |                                                            | DNA DAMAGE RESPONSE | Apoptosis                                                                 |                |

Fig 1

bioRxiv preprint doi: <https://doi.org/10.1101/305052>; this version posted April 20, 2018. The copyright holder for this preprint (which was not certified by peer review) is the author/funder, who has granted bioRxiv a license to display the preprint in perpetuity. It is made available under aCC-BY-NC-ND 4.0 International license.

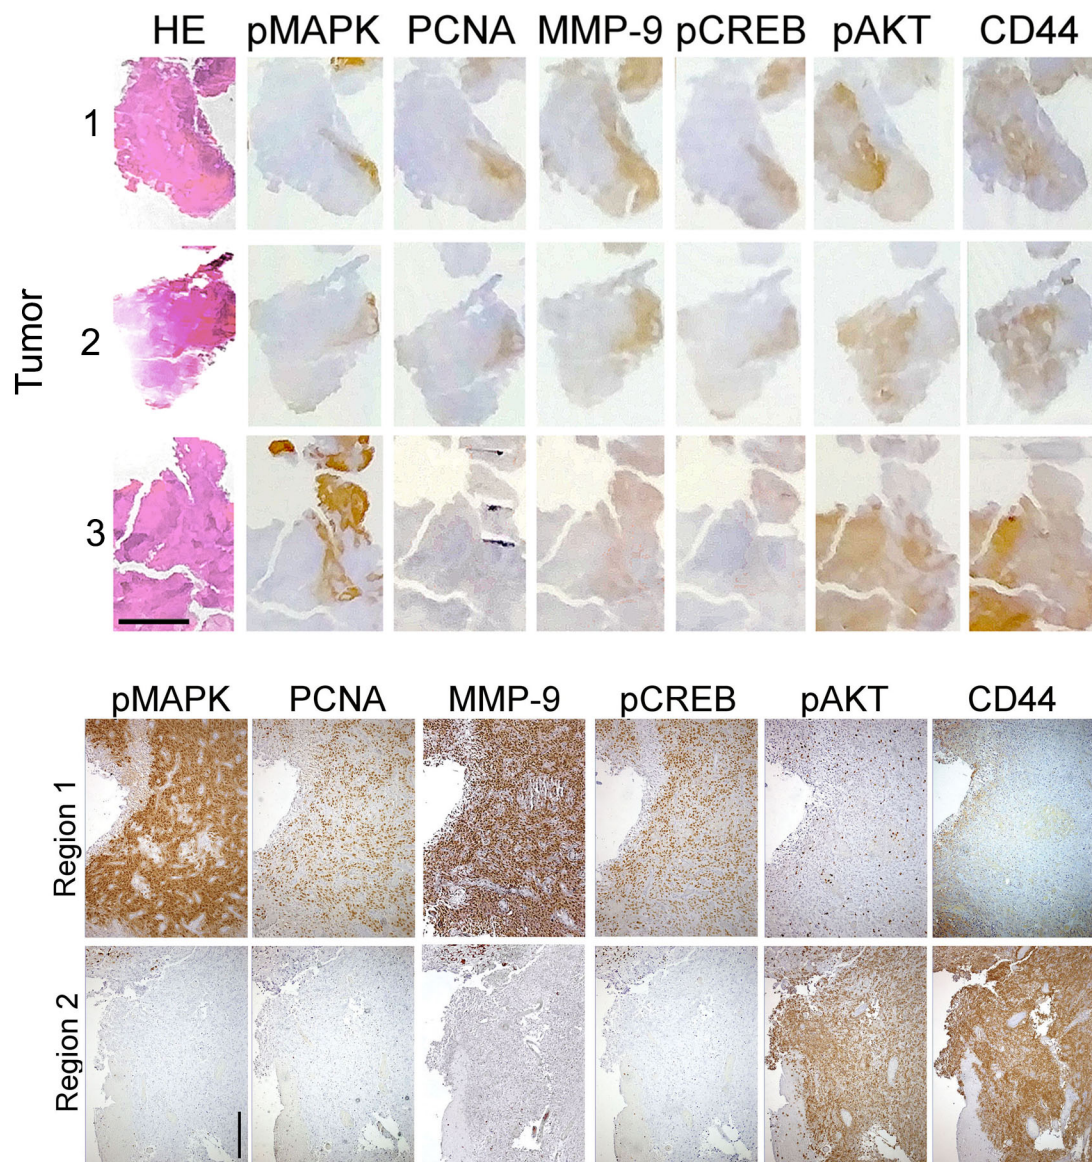

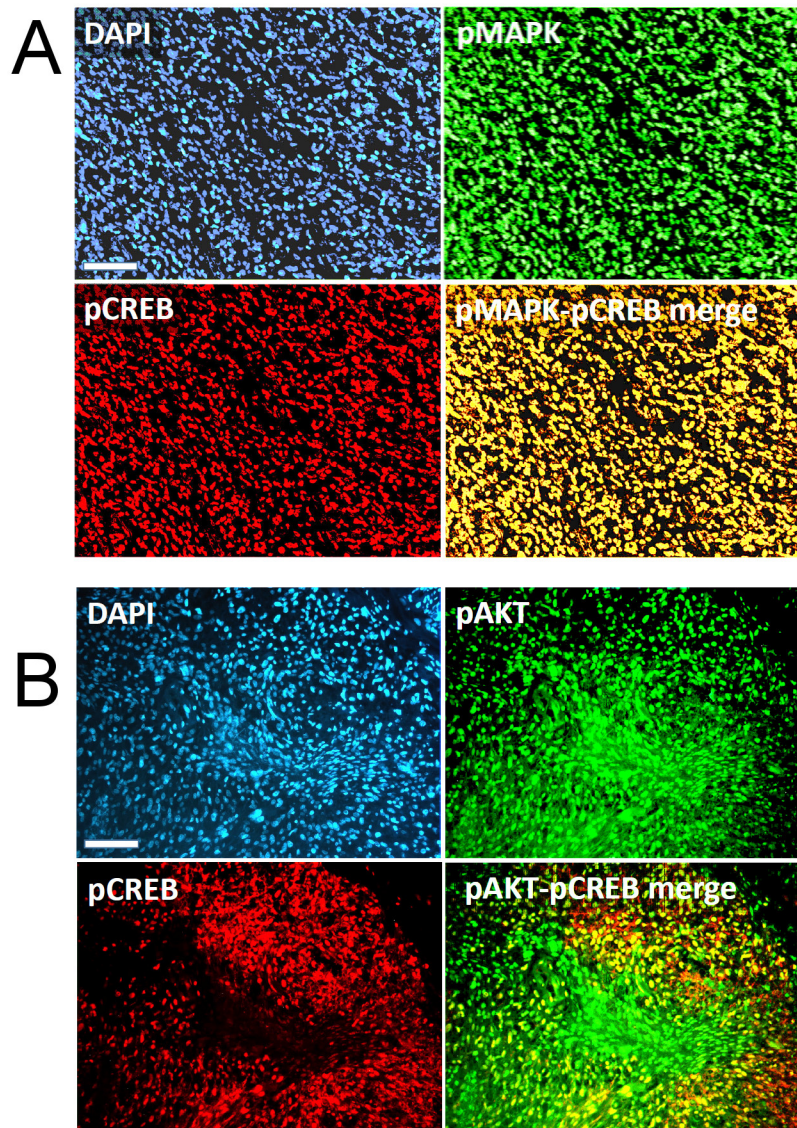

Fig 2

A

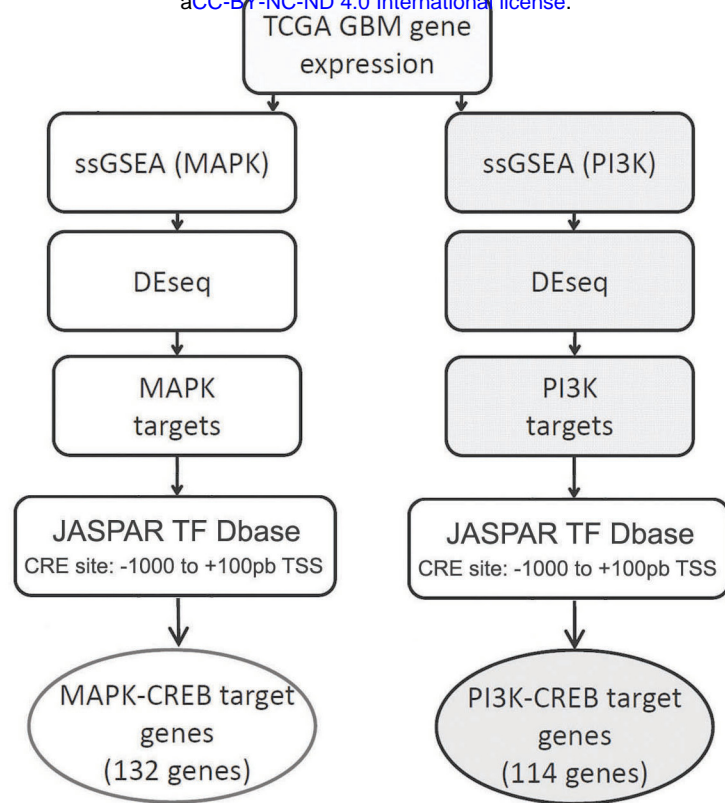

B

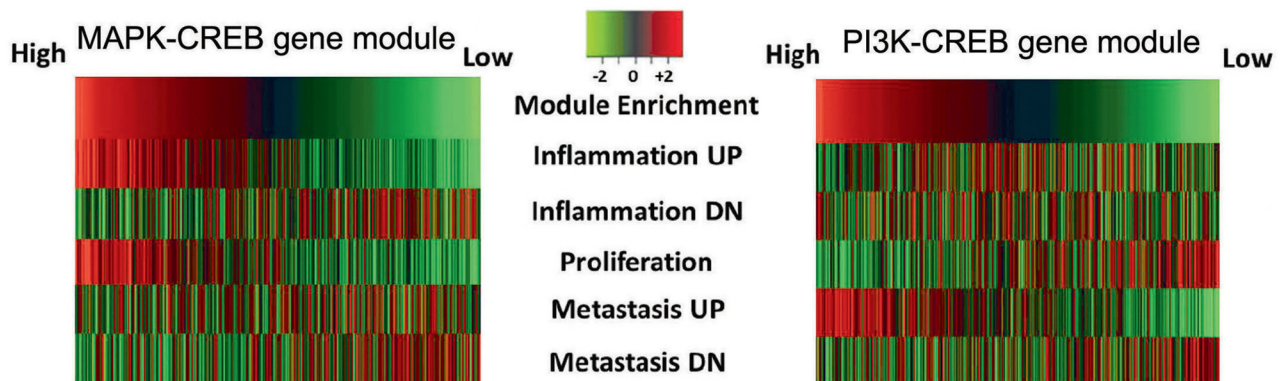

Fig 3

**A**

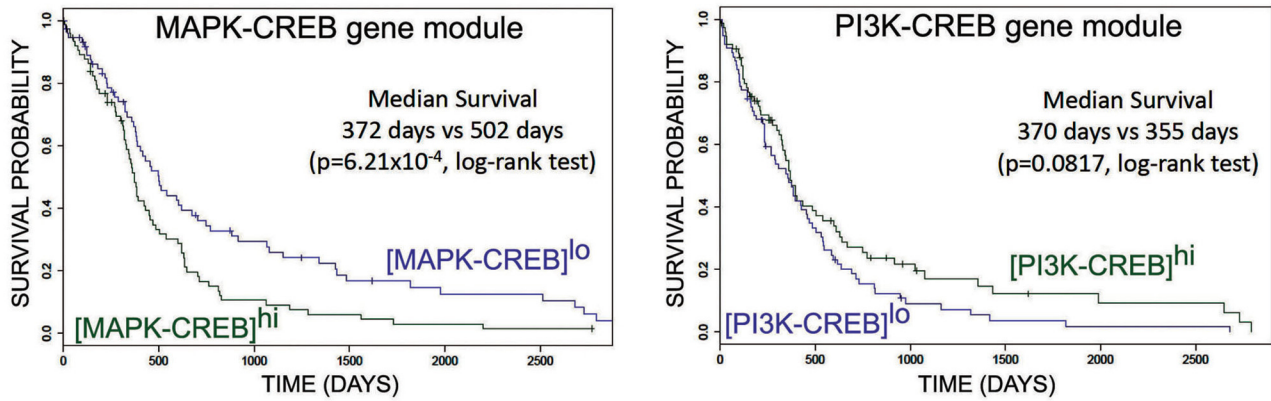

**B**

| Subtype     | All Samples | MAPK-CREB high | PI3K-CREB high |
|-------------|-------------|----------------|----------------|
| Proneural   | 26.2        | 2.7            | <b>66.8</b>    |
| Neural      | 16.2        | 1.4            | 5.6            |
| Mesenchymal | 30.4        | <b>82.4</b>    | 7.0            |
| Classical   | 27.1        | 13.5           | 19.7           |

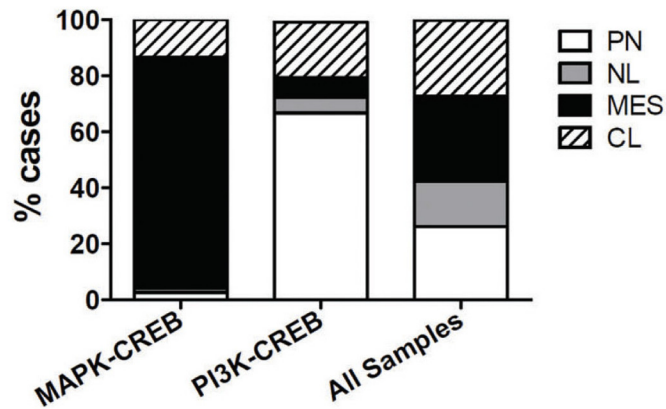

Fig 4
